# Supplementary material
Source: publisher figshare collection journal article supplement (https://aacr.figshare.com/articles/dataset/_/23274978)
Supplement: Supplementary file 1 [file 41022615]

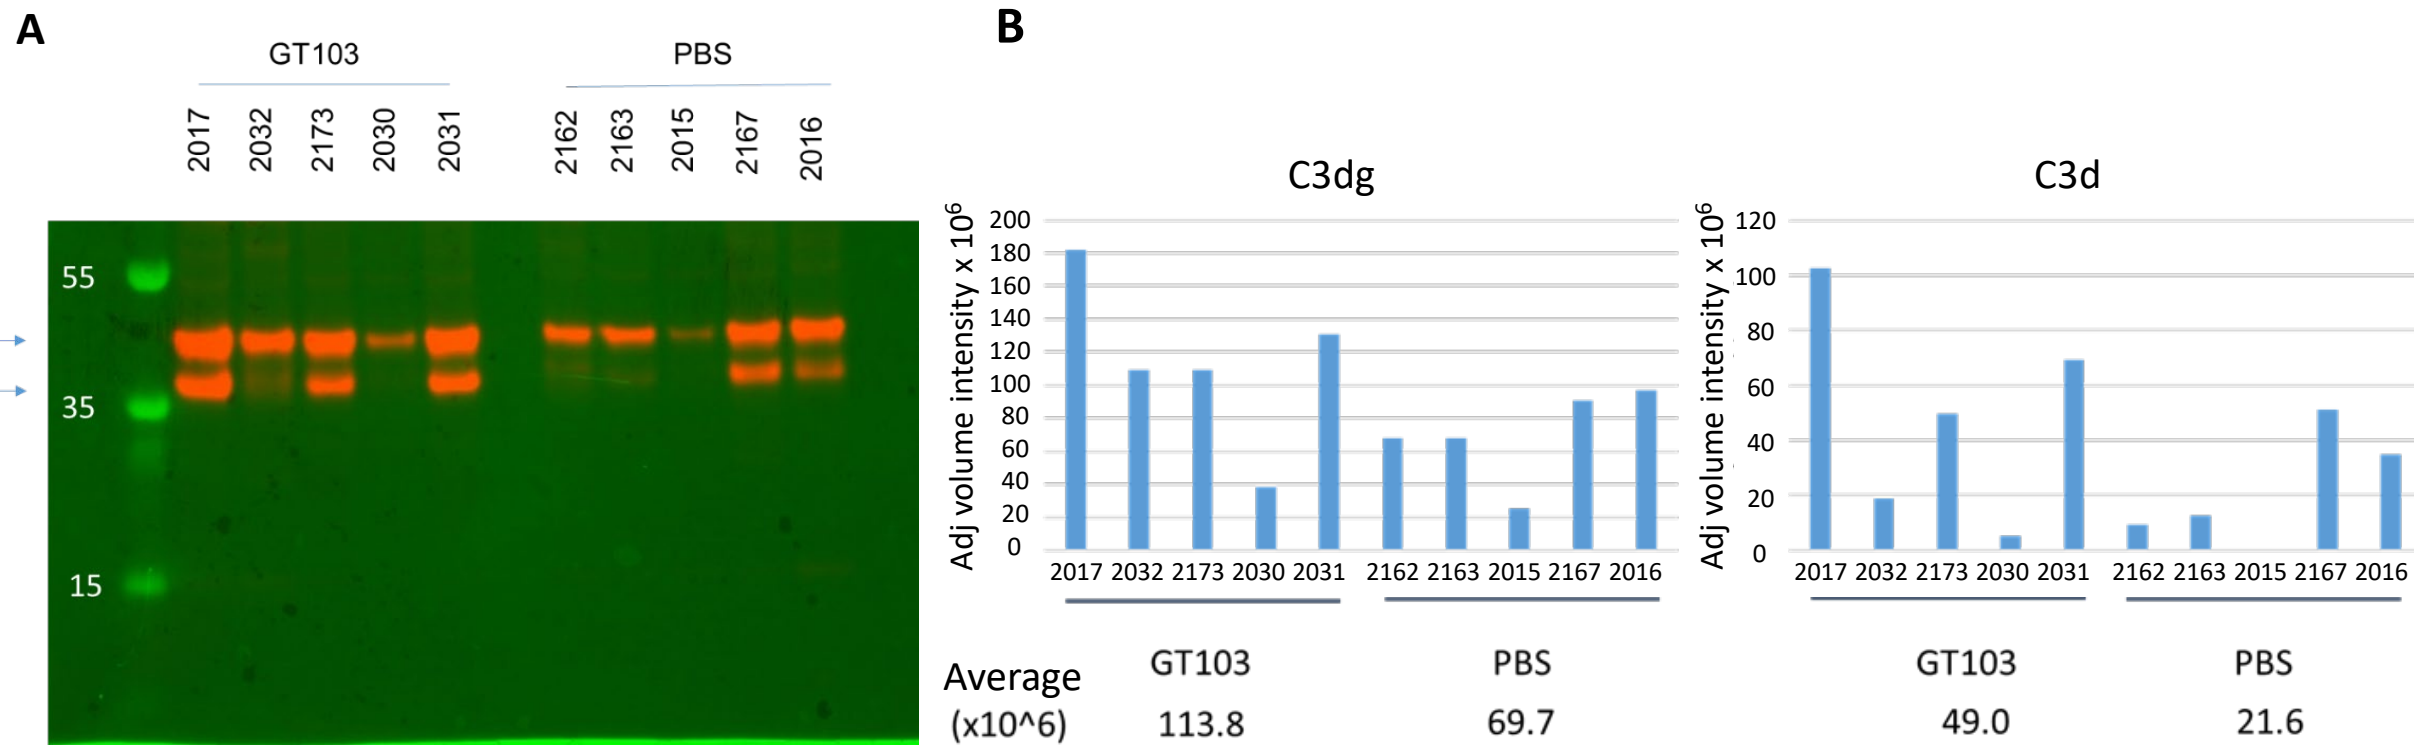

**Figure S2. Deposition of intratumoral C3dg and C3d.** Tumor lysates were made from tumors excised from GT103 or control-treated subcutaneous CMT167 tumor bearing mice (individual mouse numbers are designated on the figure). **(A)** Western blot. 15  $\mu$ g tumor lysate was loaded per lane and western blotted. The blot was probed with anti-mouse C3d goat polyclonal antibody (R&D Systems, AF2655-SP) and a secondary rabbit anti-goat HRP conjugate. The blot was washed and developed with chemiluminescent Femto reagent. **(B)** C3d and C3dg quantitation. Fluorescence in bands was measured using Image Lab Software (BioRad). The average intensity for C3dg and C3d in each treatment group is shown on the figure.
